# Supplementary material for: MiR-155-Mediated Deregulation of GPER1 Plays an Important Role in the Gender Differences Related to Inflammatory Bowel Disease
Source: Hindawi journal article supplement (doi:10.1155/2020/8811477), 2020-09-16
Supplement: f1 [file 8811477.f1.zip]

**Supplementary Table 2. classification of patients**

| Extent of disease          | Male   | female | p       |
|----------------------------|--------|--------|---------|
|                            | (n=31) | (n=19) |         |
| <hr/>                      |        |        |         |
| Age at presentation        |        |        |         |
| A1(<40)                    | 19     | 11     | 0.3859  |
| A2( $\geq$ 40)             | 12     | 8      | 0.6301  |
| location                   |        |        |         |
| L1                         | 3      | 1      | 0.87    |
| L2                         | 3      | 1      | 0.87    |
| L3                         | 9      | 4      | 0.33    |
| L4                         | 0      | 0      | >0.9999 |
| Behaviour                  |        |        |         |
| B1                         | 10     | 4      | 0.3891  |
| B2                         | 2      | 1      | 0.9828  |
| B3                         | 3      | 1      | 0.8952  |
| Montreal<br>classification |        |        |         |
| E1                         | 4      | 2      | 0.9259  |
| E2                         | 6      | 8      | 0.9259  |
| E3                         | 6      | 2      | 0.6864  |
| CDAI                       |        |        |         |
| <150                       | 8      | 1      | 0.6812  |
| 150-450                    | 5      | 8      | 0.9485  |
| >450                       | 2      | 3      | 0.9977  |
| MAYO                       |        |        |         |
| $\leq$ 2                   | 2      | 1      | 0.9802  |
| 3-10                       | 10     | 4      | 0.3638  |
| 11-12                      | 4      | 1      | 0.7323  |
