# Supplementary material for: MiR-155-Mediated Deregulation of GPER1 Plays an Important Role in the Gender Differences Related to Inflammatory Bowel Disease
Source: Hindawi journal article supplement (doi:10.1155/2020/8811477), 2020-09-16
Supplement: f1 [file 8811477.f1.zip]

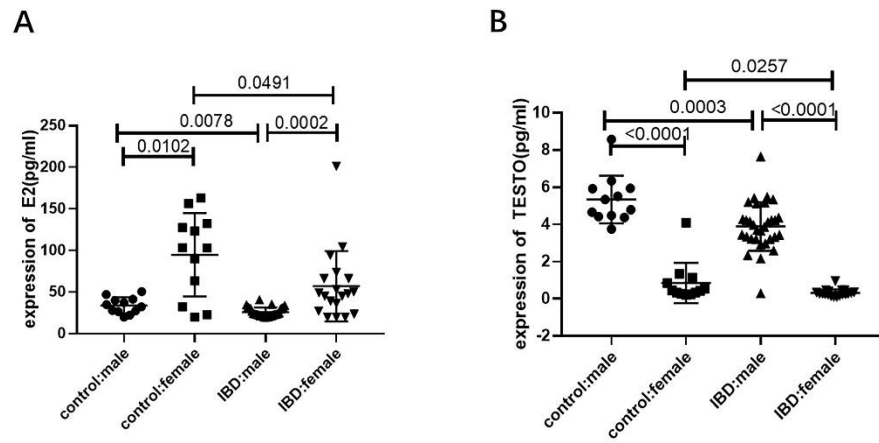

**Supplementary Figure 1.** Sex hormones of IBD patients decreased in IBD patients. Serum estradiol (A) and androgen (B) levels in serum. Values were shown as means  $\pm$  SEM;
