# Supplementary material for: MiR-155-Mediated Deregulation of GPER1 Plays an Important Role in the Gender Differences Related to Inflammatory Bowel Disease
Source: Hindawi journal article supplement (doi:10.1155/2020/8811477), 2020-09-16
Supplement: f1 [file 8811477.f1.zip]

**Supplementary Table 1. Demographic difference and laboratory finding between female and male IBD patient.**

|                           | CD (n=22)   |           |       | UC (n=28)   |             |       | Control group (n=24) |            |        |
|---------------------------|-------------|-----------|-------|-------------|-------------|-------|----------------------|------------|--------|
|                           | Male        | Female    | P     | Male        | Female      | P     | male                 | female     | p      |
| Patients, n (%)           | 15(68.2)    | 7(31.8)   |       | 16(57.1)    | 12(42.9)    |       | 12(50)               | 12(50)     |        |
| Age, years (y)            | 26.2±8.9    | 26.4±13.3 | 0.96  | 41.6±13.1   | 42.7±12.8   | 0.82  | 41.7±14.2            | 39±13.1    | 0.64   |
| Duration of disease (m)   | 30.3±29     | 50.6±42.4 | 0.20  | 40.1±60.2   | 16.3±22.1   | 0.21  | NA                   | NA         | NA     |
| Complications (%)         | 14(63.6)    | 3(13.6)   | 0.021 | 1(3.6)      | 3(10.7)     | 0.285 | NA                   | NA         | NA     |
| EIM (%)                   | 2(9)        | 3(13.6)   | 0.274 | 3(10.7)     | 7(25)       | 0.05  | NA                   | NA         | NA     |
| 5-ASA/SASP (%)            | 10(45.5)    | 5(22.7)   | 0.823 | 12(42.9)    | 7(25)       | 0.432 | NA                   | NA         | NA     |
| Corticosteroid (%)        | 5(22.7)     | 2(9)      | 0.823 | 3(10.7)     | 1(3.6)      | 0.613 | NA                   | NA         | NA     |
| Immunosuppressants (%)    | 3(13.6)     | 1(4.5)    | 0.746 | 1(3.6)      | 0(0)        | 1     | NA                   | NA         | NA     |
| Biologics (%)             | 11(50)      | 2(9)      | 0.047 | 3(10.7)     | 0(0)        | 0.238 | NA                   | NA         | NA     |
| RBC (10 <sup>12</sup> /L) | 4.6±1.2     | 3.8±0.6   | 0.12  | 4.72±1.2    | 4.14±0.77   | 0.16  | 5.29±0.48            | 4.52±0.31  | 0.0001 |
| WBC (10 <sup>9</sup> /L)  | 7.7±2.9     | 7.8±2.2   | 0.89  | 8.4±3.6     | 7.5±2.2     | 0.46  | 6.18±1.01            | 5.47±1.27  | 0.143  |
| PLT (10 <sup>9</sup> /L)  | 282.4±130.7 | 400±101   | 0.049 | 270.3±148.8 | 310.7±105.5 | 0.431 | 180.7±28.6           | 173.3±38.3 | 0.601  |
| Hgb (g/L)                 | 128.3±31.1  | 91.6±20.6 | 0.01  | 122.3±29.5  | 112.1±26.5  | 0.358 | 144.7±11.7           | 128.8±11.3 | 0.003  |
| ALB (g/L)                 | 39.7±9      | 38.3±7    | 0.72  | 39.6±5.8    | 38.5±6.9    | 0.664 | 46.84±3.65           | 46.2±3.03  | 0.657  |
| CRP (mg/L)                | 17.5±22     | 31.4±25.9 | 0.21  | 34.4±55.6   | 29±39.9     | 0.77  | 0.24±0.09            | 0.28±0.07  | 0.308  |
| ESR (mm/h)                | 24±21.2     | 54.7±32.3 | 0.014 | 21.1±19.5   | 36.1±25     | 0.09  | 5.66±3.14            | 7.91±3.03  | 0.088  |

Abbreviations: EIM: extraintestinal manifestation; RBC: red blood cell; WBC: white blood cell; PLT: platelet; Hgb: hemoglobin; ALB: Albumin; CRP: C-reactive protein; ESR: erythrocyte sedimentation rate
